# Supplementary material for: Metagenomic Analyses Reveal Gut Microbial Profiles of Cnaphalocrocis medinalis Driven by the Infection of Baculovirus CnmeGV
Source: MDPI journal article supplement (doi:10.3390/microorganisms12040757), 2024-04-09
Supplement: s1 [file s1]

**Supplementary Table S1** Numerical data of the gut microbiota metagenome of *C. medinalis*

| Sample ID | Insert Size (bp) | RawReads (#) | RawBase (GB) | % GC | Clean reads (#) | Cleaned (%) | Clean Q20 (%) | Clean Q30 (%) |
|-----------|------------------|--------------|--------------|------|-----------------|-------------|---------------|---------------|
| CnmeGV24  | 350              | 26739451     | 8.02         | 39   | 25268233        | 94.5        | 98.97         | 95.79         |
| CnmeGV48  | 350              | 26222897     | 7.87         | 39   | 24887590        | 94.91       | 98.91         | 95.59         |
| CnmeGV72  | 350              | 26712575     | 8.01         | 38   | 25358657        | 94.93       | 98.95         | 95.69         |
| control24 | 350              | 26822439     | 8.05         | 38   | 25461569        | 94.93       | 98.97         | 95.77         |
| control48 | 350              | 26956893     | 8.09         | 38   | 25536954        | 94.73       | 98.95         | 95.7          |
| control72 | 350              | 28806158     | 8.64         | 38   | 27244287        | 94.58       | 98.96         | 95.76         |

Sample ID: sample name; InsertSize (bp): represents the use of a 350 bp Library; RawReads: sequencing number of raw reads; RawBase: total base pair number in the sequencing raw data, calculated by the product of RawReads and the sequence length; %GC: the percentage of GC content in the bases; Clean reads: the valid reads number after filtered; Cleaned (%): the percentage of Cleanreads to Rawreads. Clean Q20, Q30: the percentage of base numbers in CleanData with a mass value greater than 20 and 30.

**Supplementary Table S2** Sequence number of different species in the *C. medinalis* gut

|                 | Bacteria | Fungi | Archaea | Viruses |
|-----------------|----------|-------|---------|---------|
| Sequence Number | 6018759  | 28906 | 38      | 111     |

**Supplementary Table S3** Sequence number of OTU classified as virus

| #OTU ID                                                                                   | CnmeGV24 | CnmeGV48 | CnmeGV72 | control24 | control48 | control72 |
|-------------------------------------------------------------------------------------------|----------|----------|----------|-----------|-----------|-----------|
| Taxon00149                                                                                | 49       | 57       | 5        | 0         | 0         | 0         |
| taxonomy                                                                                  |          |          |          |           |           |           |
| k_Viruses;p_c_o_f_Baculoviridae;g_Betabaculovirus;s_Cnaphalocrocis_medinalis_granulovirus |          |          |          |           |           |           |

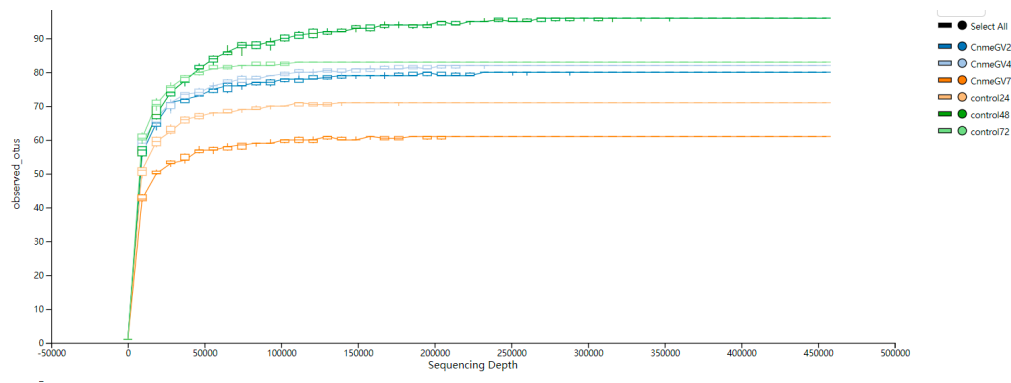

**Supplementary FIGURE S1 Rarefaction curves of the observed OTUs in different samples.**

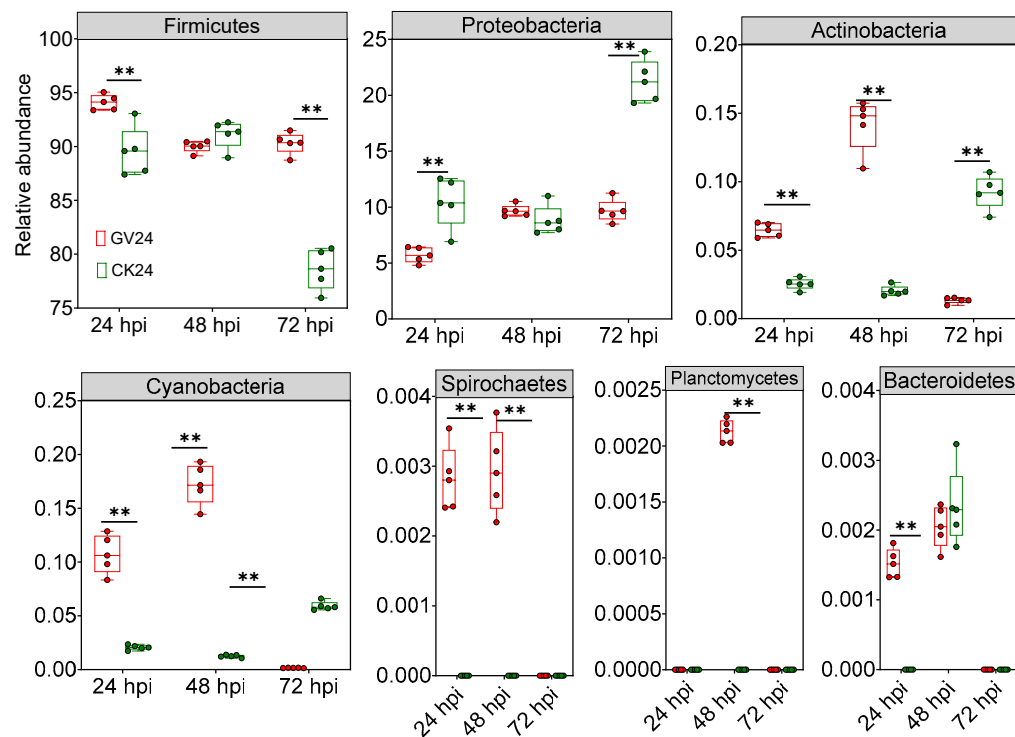

**Supplementary FIGURE S2 Box plots of frequency for the gut microbiota at the phylum level**

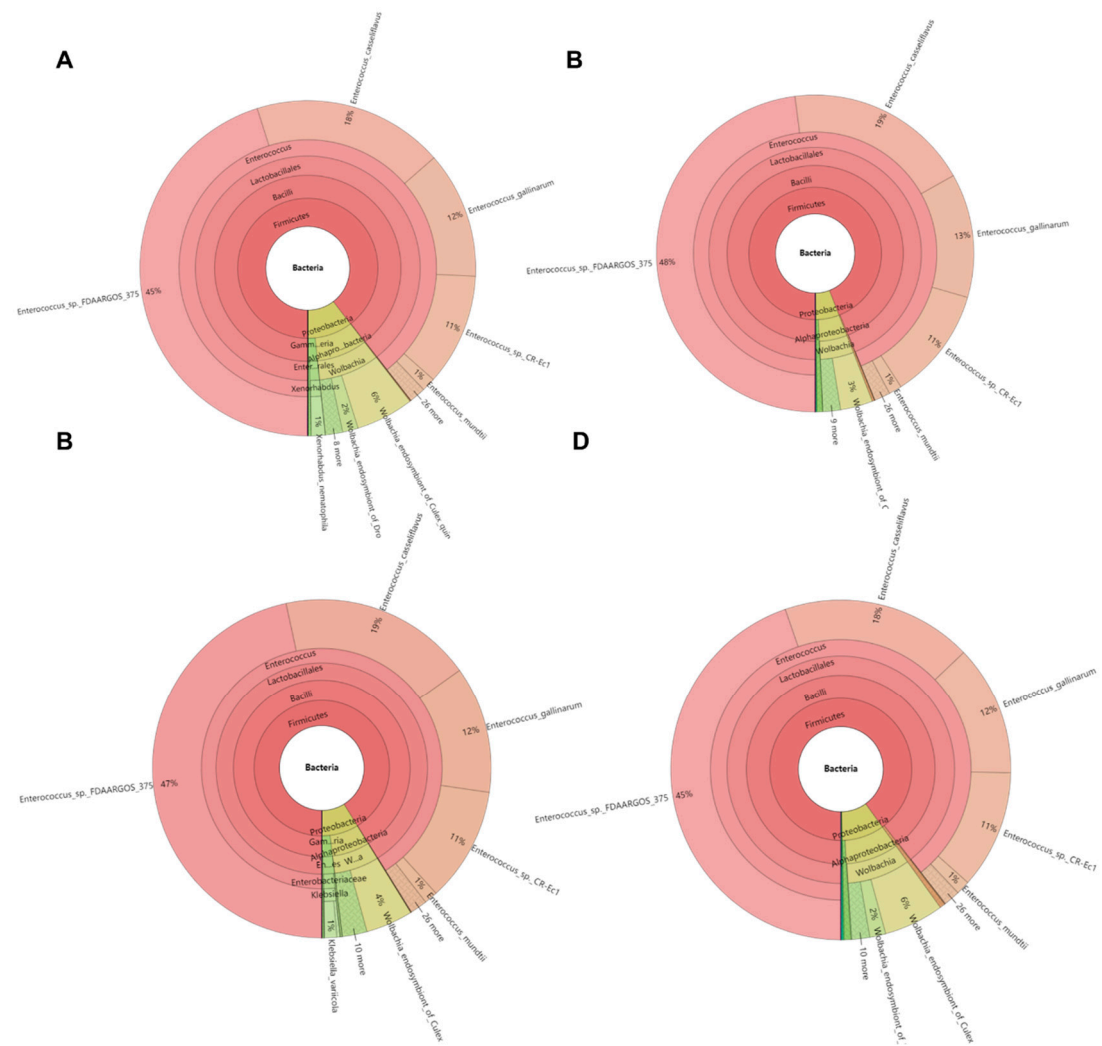

**Supplementary FIGURE S3** Krona plots display the classification and composition changes of bacteria in the larvae gut of *C. medinalis* after CnmeGV infection. (A) Mock-infected at 24 hpi, (B) CnmeGV-infected at 24 hpi, (C) Mock-infected at 48 hpi, (D) CnmeGV-infected at 48 hpi.

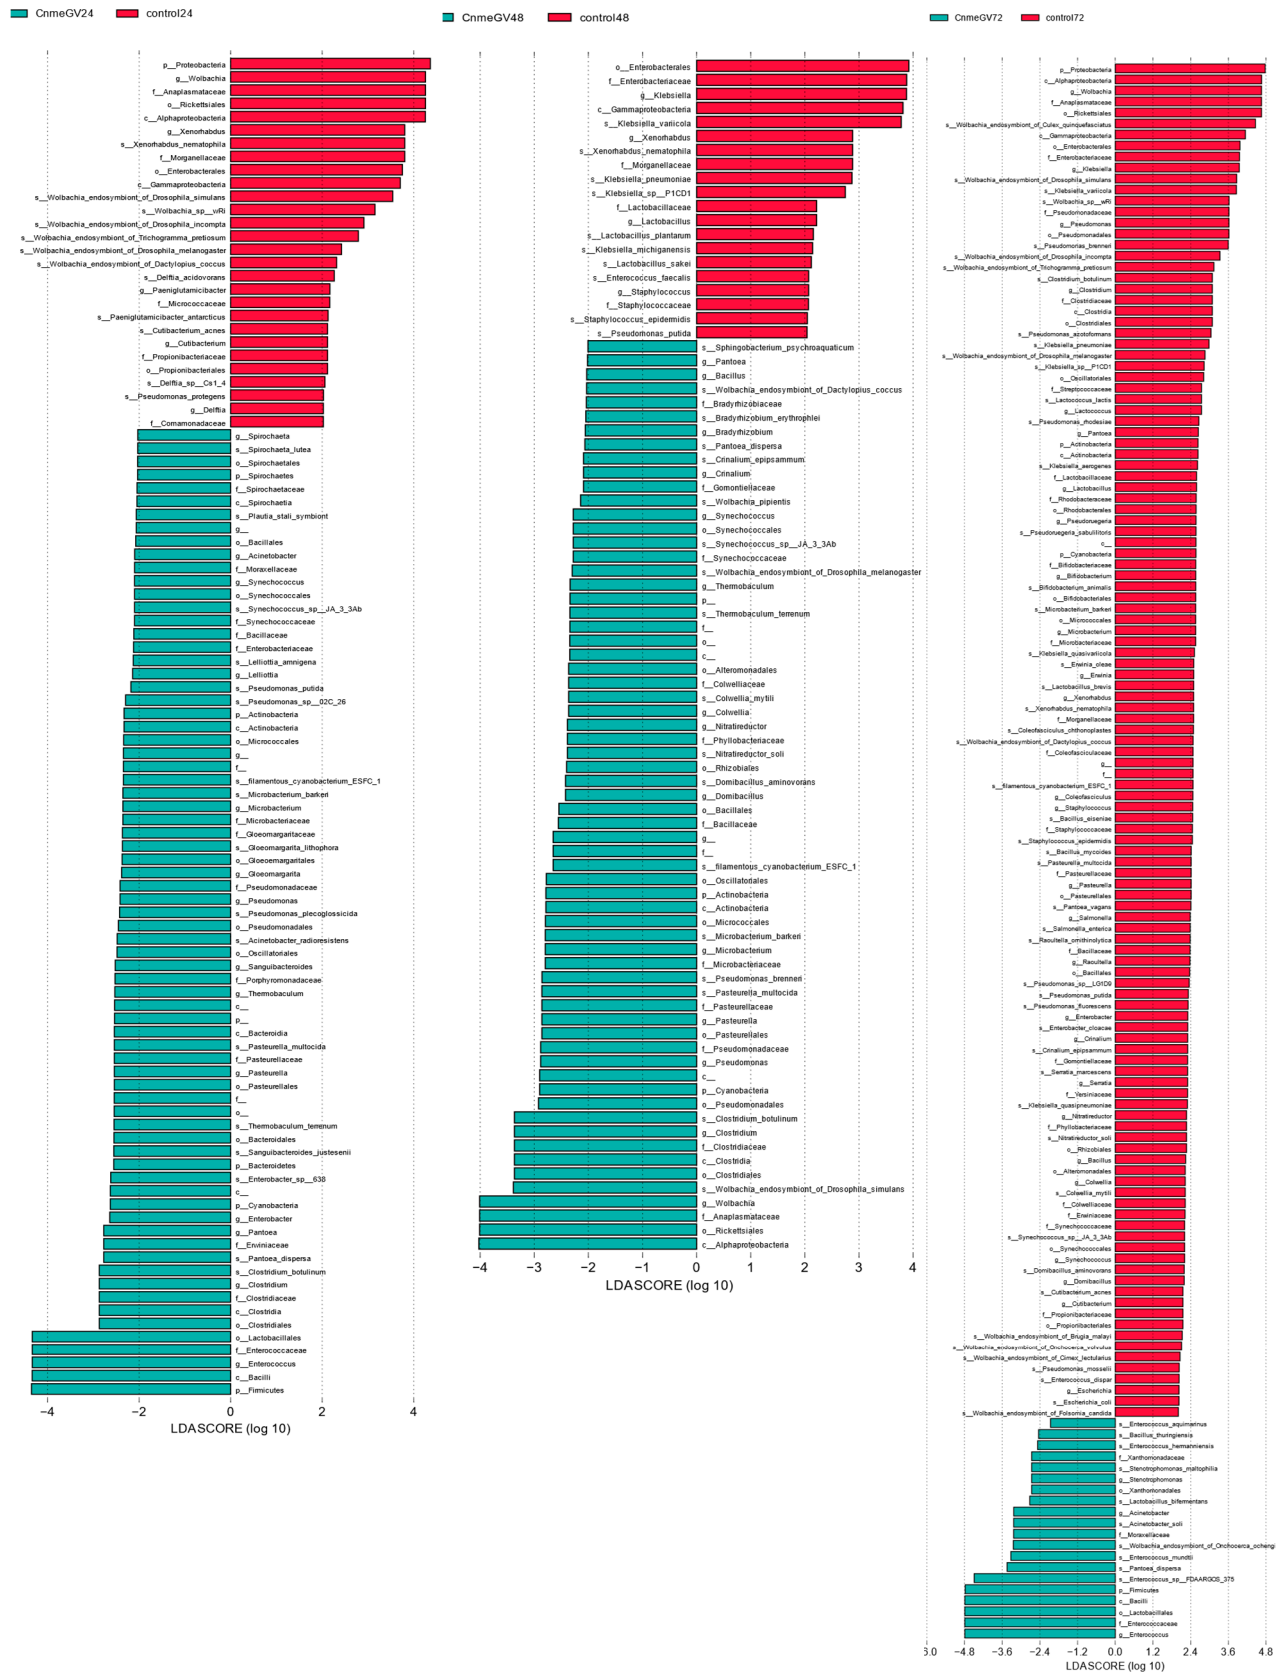



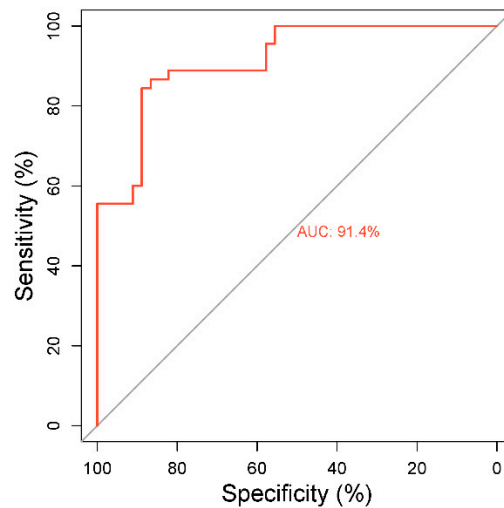

**Supplementary FIGURE S6 ROC curve displaying the discriminatory potential of the random forest model in distinguishing CnmeGV-infection. AUC, area under curve.**

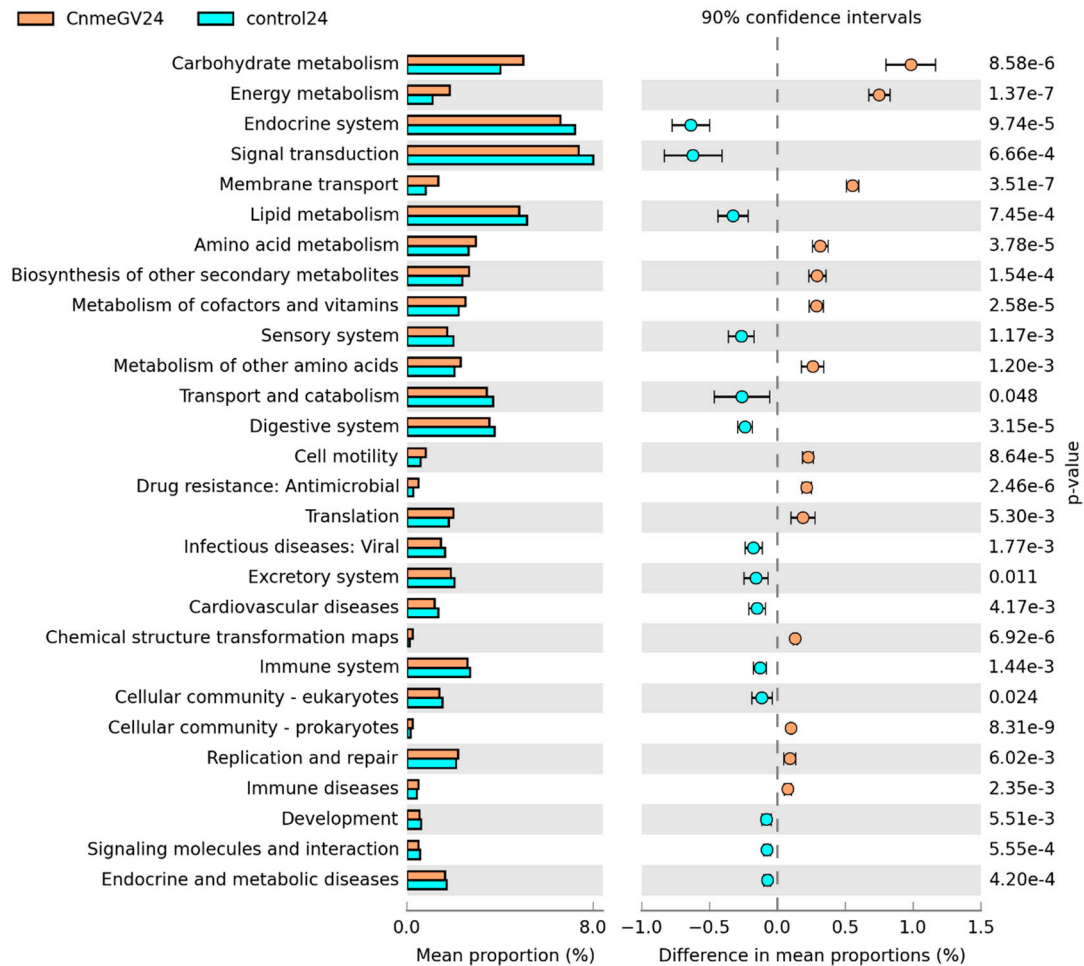

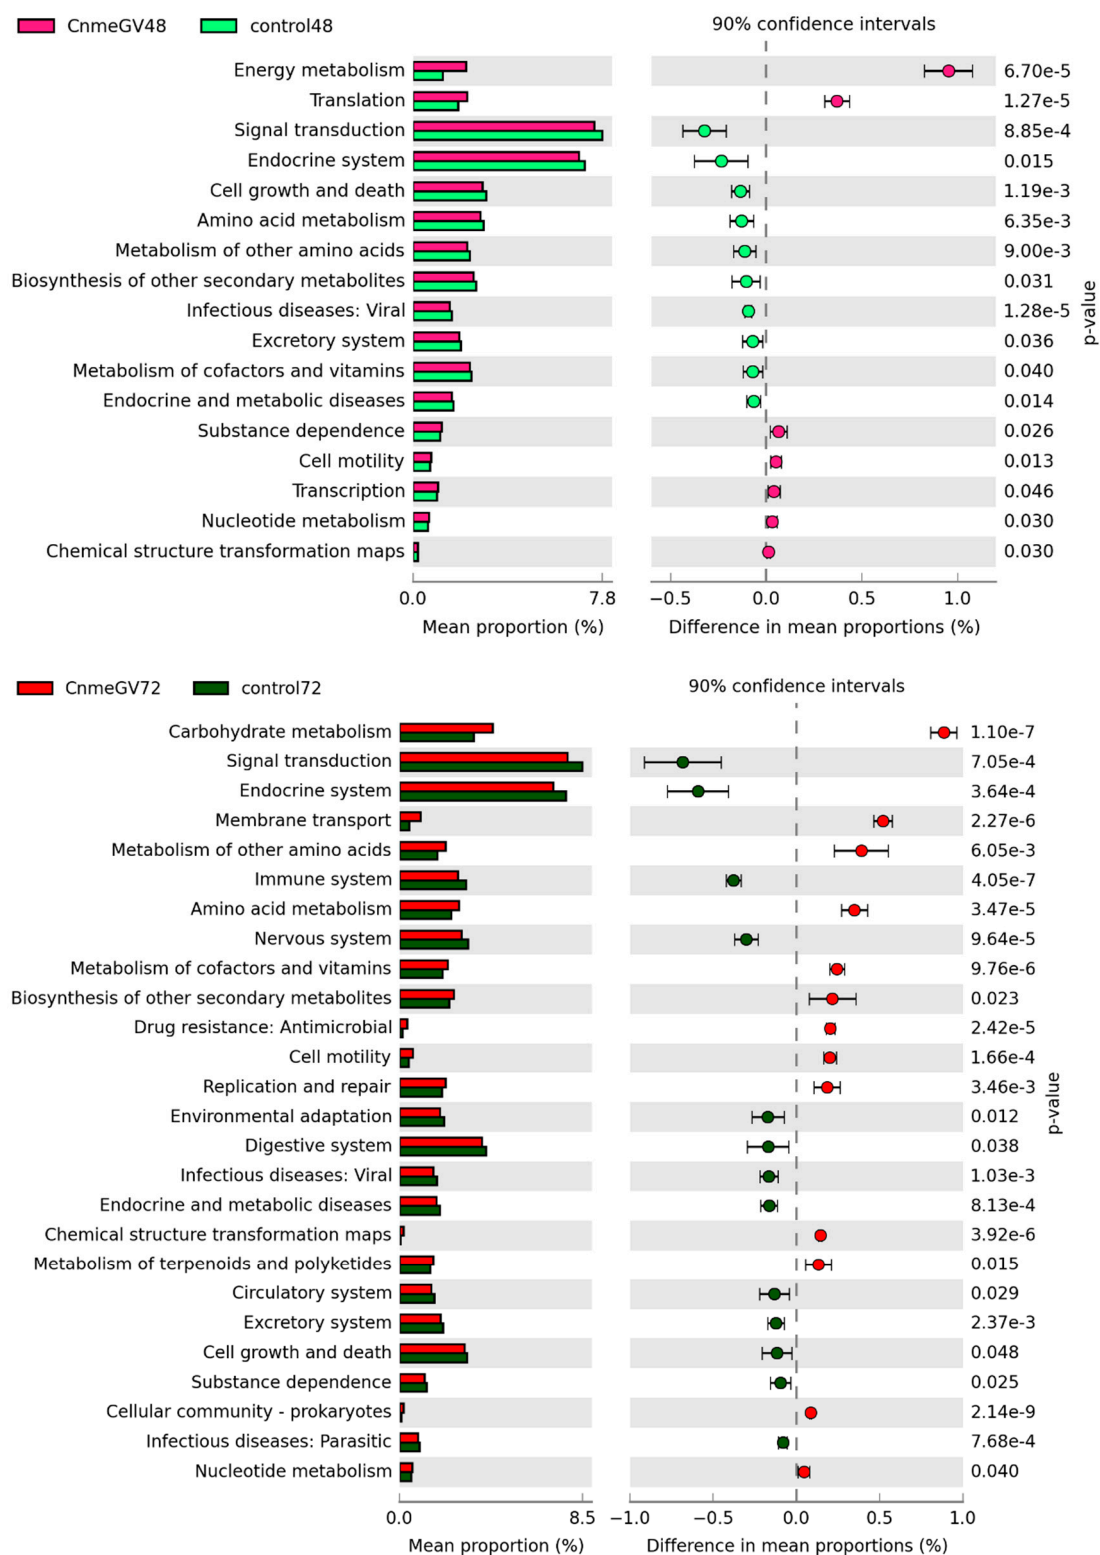

**Supplementary FIGURE S7 KEGG pathways found at significantly different abundances in the gut microbiota metagenomics profiles as identified by PICRUST and STAMP analysis.**
